# Supplementary material for: Validation of precipitation reanalysis products for rainfall-runoff modelling in Slovenia
Source: Copernicus journal article supplement (doi:10.5194/egusphere-2022-1279), 2022-12-06
Supplement: Supplementary file [file egusphere-2022-1279-AC1-supplement.pdf]

Reply to reviewers for the manuscript:

## **Validation of precipitation reanalysis products for rainfall-runoff modelling in Slovenia**

by Marcos Julien Alexopoulos, Hannes Müller-Thomy, Patrick Nistahl, Mojca Šraj, and Nejc Bezak

The authors thank both reviewers for their constructive comments on the manuscript, which will help to improve it. Please find below detailed reply to all comments in [blue](#). Also, where appropriate, we suggest a possible modification of the manuscript to incorporate our reply (in [green](#)).

### **Reviewer #1:**

I have read the manuscript entitled " Validation of precipitation reanalysis products for rainfall-runoff modeling in Slovenia", which is a comparative analysis of two reanalysis precipitation datasets, ERA5-Land and COSMO-ERA6, to runoff simulation over different regions of Slovenia

***the manuscript is relatively interesting and well written.*** I consider that it is suitable for publication in the EGU sphere journal, although, I would like to give some comments to the authors for the general improvement of the manuscript.

[We thank reviewer #1 for the acknowledgement of the manuscript suitability to HESS, for her/his time and efforts and the resulting comments.](#)

1- Please use more recent papers that are relevant to your topic. Below you can find some new studies:

<https://link.springer.com/article/10.1007/s11269-022-03081-9>

<https://www.tandfonline.com/doi/full/10.1080/02626667.2019.1691217>

[We would incorporate the suggested references at line 93 of the current manuscript as follows:](#)

[Feng et al. \(2021\) evaluated precipitation reanalysis in the United States. Their comparative analysis shows mixed results: reanalysis is unable to capture rainfall dynamics in the northern part, whilst results are adequate in the rest of the study area. Another study using SWAT assessed the performance of 14 remote sensing products over a macro-scale watershed in Pakistan. Not much has been investigated for snowmelt-driven runoff, however Bhattacharya, Khare and Arora \(2019\) suggest that reanalysis datasets can outperform observations at the monthly scale.](#)

2- Improve the quality of all figures. For example, in Fig1, 2, texts and numbers are blurred and need to improve.

[We would like to thank the Reviewer #1 for this comment. We have seen that the figure quality in the submitted manuscript is low, which is caused by the submission of the manuscript as a](#)

single file containing all figures. Each figure itself is of high quality and will be submitted as a single-file for the final manuscript composition.

3- What are your criteria for mesoscale, large-scale, and microscale categories?

Indeed, this definition depends on the field of hydrologic application. For rainfall-runoff modelling, mesoscale typically refers to catchments with areas ranging from few  $10^1$  km<sup>2</sup> to several  $10^2$  km<sup>2</sup>. Of course, catchments with smaller areas are considered as micro-scale, with larger areas as macro-scale. So, the studied catchments all belong to the mesoscale as mentioned in the manuscript.

4- Some of the studied catchments have an Area value lower than 100 km<sup>2</sup>, While ERA5-Land cells are higher than 100 km<sup>2</sup>. How did you deal with this issue? I think using this dataset for small catchments is not suitable. However, Still I don't understand your criteria for mesoscale. these catchments fall in the microscale category.

Thanks for this comment. ERA5-Land has a raster width of ~9 km, so the area covered by one raster cell is 81 km<sup>2</sup> (for REA6 it's 36 km<sup>2</sup>). To account also for raster cells that only partially cover the studied catchments, the calculation of areal precipitation and temperature from the reanalysis data includes the total overlapping area of each relevant raster cell. The reviewer points out, that the spatial resolution is too coarse to use it as input directly for rainfall-runoff simulations. Indeed, testing this hypothesis is one part of the manuscript. Our findings suggest, that with the applied lumped rainfall-runoff model and especially after recalibration the reanalysis data leads to similar good simulation results as observations (Fig. 11, L482-485).

5- The values of numbers in Table 3 are not clear and I can't check the dataset combinations.

We would like to thank the Reviewer #1 for pointing to this. Table 3 is essential for the understanding of all follow-up results, since it provides the composition of precipitation (circle) and temperature (box) data from either observations, ERA5-Land and COSMO-REA6. The table is not expected to contain values, the symbols (box, circle) indicate only which data type (temperature, precipitation) from which data set (observations, ERA5-Land, COSMO-REA6) is used for which combination (1-9). We will add this information in the revised manuscript to avoid possible confusions.

Added the following in I258

The purpose of the table is to indicate the data type (temperature, precipitation) and data set (observations, ERA5-Land, COSMO-REA6) used for each combination (1 – 9), rather than to present specific values. Therefore, the symbols (box, circle) are used to represent the data sources instead of actual values.

6- The authors used the GR4H model for runoff simulation. Based on the model structure (Fig 4), this model doesn't consider the snow component through the modeling. How do you explain this issue for snowy catchments of Slovenia?

Reviewer #1 points out the missing snow routine in GR4H as potential error source for rainfall-runoff modelling of snowy catchments. We agree on this potential issue and thus we compared the simulation results from both the GR4H and the GR4H CemaNeige, model as well. The CemaNeige is a snow module (L240-249). Especially for alpine catchments, GR4H Cema Neige yields better results than GR4H (L472-476).

We will add this information in the revised manuscript at L1340:

However, the implementation of the snow component leads to an increase in performance for the Savinja-Nazarje, Poljanska Sora-Zminec and Selška Sora-Železniki catchments during the validation period.

7- For precipitation comparison, which approach is used in this study? Point-scale or Grid-scale approach? However, Based on fig1 and fig3 the density of your ground-gauge observations is not so good.

We agree with reviewer #1 that the results from point- and grid-based comparisons can differ significantly. Due to the different areas covered with station-based observations and reanalysis data we did not carry out any comparisons based on station data (L179-185). An interpolation on hourly level would have been no solution due to the low network density as reviewer #1 pointed out.

Hence, the comparison was carried out on daily values of areal rainfall based on an interpolated raster data set from the Slovenian Environment Agency (ARSO). This is explained in L186-190.

8- It is recommended to plot stream flow time series for a better understanding of model performance for simulating peak and low flows.

Thanks for this suggestion. We agree that the manuscript could benefit from visual inspections of the simulated runoff time series. We will add a figure in the revised manuscript.

9- For the estimation of ET, which formulas and datasets are used for running the GR4H model? Please clarify this issue in the revised paper.

9. For the estimation of ET, the method of Oudin et al. (2005) is applied (L221). This method is based on 27 potential evapotranspiration formulas. Maybe this link is useful as well: <https://webgr.inrae.fr/en/models/evapotranspiration-model/>.

10- Why didn't the authors consider the uncertainty analysis for using the GR4H model?

10. Thanks for this useful comment. While uncertainty analysis is certainly an important aspect of hydrological modelling, it is (if done properly) a high-complex process that require additional data and resources. Given the scope of our study, we chose to focus on evaluating the performance of reanalysis without bias adjustment using the GR4H and GR4H CemaNeige hydrological models for streamflow simulation. We think a comprehensive uncertainty analysis is beyond the scope of our study.

## Reviewer #2

The authors present a study evaluating two reanalysis products against a gridded precipitation dataset that was constructed based on ground observational data from errors in input sources and errors propagated into hydrologic simulation across 16 catchments in Slovenia. The paper is within the scope of EGU sphere, however, major revisions must be made before considering publication. Below lists my major concerns regarding the scope of this study, methodology, and results presentation.

We thank Reviewer #2 for the acknowledgement of the manuscript suitability for HESS journal, for her/his time and efforts and the resulting comments.

Major

comments:

1. The scope or motivation of this study is not well articulated. Apparently, reanalysis datasets are not used to solve precipitation, but rather other meteorological variables. Precipitation variable is a by-product. Most of the reanalysis datasets do not directly assimilate precipitation into model chain (Although ERA5 and MERRA2 did assimilate precipitation). For hydrologic utilities - like floods the authors mentioned, a reanalysis dataset is not qualified and should not be a supplement for real observations unless no observations available. In summary, the authors should provide a strong argument prior to their analysis - why use reanalysis for hydrologic modelling since observational datasets exist.

1. Thanks for this comment. The hydrology community recognizes that the majority of river basins lack adequate data for comprehensive analysis. Insufficient weather station data poses a significant obstacle for conducting hydrological assessments and gaining a full understanding of the underlying processes in a specific region. Reanalysis datasets and EO derived datasets are increasingly becoming popular alternatives for filling this gap. However, to use them for commercial purposes, proper validation is necessary, as each product is tailored for different regions worldwide. One of the key advantages of reanalysis datasets is their availability of consistent and reliable data over extended periods, particularly in regions with data gaps. These datasets offer a wealth of information on critical meteorological variables such as temperature humidity, wind and pressure, which are crucial inputs for hydrological assessments, depending on the type and detail of the modelling applied. Regarding the 'existence of observations', we mention in the manuscript that the existing observations on hourly resolution in Slovenia have neither the temporal nor spatial coverage of the reanalysis data – so reanalysis data are an essential benefit for any hydrologic modeller.

2. In the introduction, I am not convinced by the facts why the authors chose to evaluate reanalysis data. In line 61-63, the authors stated that " mostly data gathered by means of remote sensing technology. ". First, I would like the authors to state why they are not considering other satellite derived products which have been proven to perform better than reanalysis. I am concerned the scope of this study. See my first comment.

2. Thank you for the comment. Indeed, satellite data can provide valuable information for hydrological studies. However, reanalysis data cover longer periods than satellite datasets. For

example, ERA5-Land is available since 1950s and is expected to start in 1940s soon (since ERA5 was updated during the review process and starts now in 1940). In addition, there is literature currently in favour of reanalysis products over satellite for certain regions. For example, the study conducted by Zhang et al. (2021) compared the performance of satellite-based and reanalysis precipitation products for hydrological modelling in the Beipanjiang river basin. The four satellite products used in the study are TRMM, GPM, IMERG and CMORPH, while the reanalysis used is ERA5-Land. The study found that ERA5-land outperforms all four satellite products in terms of accuracy and consistency in both wet and dry seasons. Specifically, ERA5-land shows higher KGE and NSE values and lower MAE values compared to the satellite products. Another study compared three precipitation products in the Upper Blue Nile Basin. The study evaluated the performance of the TRMM, CHIRPS and COSMO-REA6 at the three-hourly timestep. The findings show that COSMO-REA6 slightly outperformed the satellite-based precipitation products in the wet season. COSMO-REA6 displays a KGE value of 0.62, whilst TRMM and CHIRPS had a value of 0.57 and 0.58, respectively. The fact that: i) certain reanalysis products can outperform satellite estimates in specific regions; ii) there is a scarcity of findings regarding the reliability of weather station alternatives in the domain of Slovenia; and iii) some of these alternatives are provided at the hourly timestep, provide in our opinion a solid motivation for conducting the present research.

Zhang, Y., Chen, X., He, Y., Zhu, Y., & Liu, S. (2021). Comparison of satellite and reanalysis precipitation data for hydrological modeling in a large karst catchment. *Journal of Hydrology*, 597, 126166. doi: 10.1016/j.jhydrol.2020.126166

Gebremichael, G.G., Hossain, F., Erickson, T., Gao, H. & Hopson, T. (2017). Evaluation of the performance of precipitation products for hydrological modeling over the Upper Blue Nile Basin. *Journal of Hydrology*, 550, 406-418. doi: 10.1016/j.jhydrol.2017.05.021

The revised manuscript would be extended at L 439:

This study has offered useful insights into the hydrological response of the catchments studied in relation to the selected PRPs. The next step in this field of research would be to evaluate the use of satellite and other means of remote sensing data to obtain a thorough overview of the available options of handling missing weather station data in Slovenia.

3. The authors site a range of literature on evaluation of reanalysis in Lines 52- 93. However, I don't see a summary of what the reviewed studies did not do, that is compensated by the current study and why reanalysis for Slovenian catchments. The authors should make this clear in the introduction.

3. We thank reviewer #2 for pointing out a missing structure in the literature review. The intended structure is:

L52 – 76 Focus on literature that validates the rainfall products against observations.

L77 - 93 Review of the literature of reanalysis in hydrological applications. On each reference, besides the location, the temporal resolution is also referred to.

L94 onwards pinpoint gracefully the motivation to validate reanalysis at higher temporal resolutions (daily, hourly), which are not common yet in literature. Also, due to the high spatial variability and intermittency of rainfall a regional validation of reanalysis data is always required/recommended. So, the scientific aim of the study is i) the validation for the temporal resolution of 1 hour and ii) Slovenia as region of interest since it is characterized by large variability in rainfall patterns (e.g., some of the highest rainfall erosivity values in Europe). In the revised manuscript we will improve the structure to pinpoint the research gap we try to close with our study.

4. Why is the ARSO-d data considered as the benchmark? There are other observational precipitation datasets available such as IMERG, MSWEP and GSMaP. The authors should provide more information to claim that ARSO-d data is more accurate than reanalysis products. More details of the on this data should be provided, such as data quality, and the data source, validation etc.

4. The ARSO-d data set is the official data set from the Slovenian Environment Agency (ARSO), which indicates the consideration of the regional knowledge for the spatial interpolation of all rain gauge data from ARSO. Moreover, this dataset does take into consideration all the station-based data available operated by ARSO. IMERG, MSWEP and GSMaP are satellite products (partially in combination with ground-based observations), recommended for regions without ground-based observations (or with low network density), which is not the case for Slovenia on the daily scale. In general, ground observations are considered as 'truth'.

We agree that different rainfall products have different strengths and weaknesses, but a validation of the officially used rainfall data set from the ARSO is beyond the scope of this study. Also, if comparisons with the satellite products recommended by Reviewer #2 indicate deviations, we still would not know which data set to trust more (especially if deviations differ between the satellite products). We stick to ground-based observations as truth, but would implement this discussion in the revised manuscript in order to more clearly address issues raised by the Reviewer #2.

5. How is calibration applied to different forcing?

5. The calibration is carried out following two approaches: 1. Parameters are calibrated for configuration1, then the calibrated parameter set is used for all other configurations; 2. The calibration is re-run for each configuration (L262 -264). Several modifications were made in the manuscript in order to more clearly indicate this.

6. Include the location of the catchments in Table 1 (Lat and Lon), catchment characteristics relevant in the formation and dominant hydrological processes

6. We thank Reviewer #2 for this suggestion. We can add some additional information and we will extend the discussion. An example for a possible data expansion and explanation at L 119 would be (+ the extension of characteristics in the table):

These characteristics are selected, as catchments with larger areas typically receive more precipitation and have higher water storage capacities than smaller catchments. This leads to a lower runoff coefficient and slower runoff response, as water moves through the catchment over longer distances and time periods. Median altitude is another important factor that influences the generation of runoff. Catchments with higher median altitudes generally experience lower precipitation amounts and have lower water storage capacities due to the presence of steep slopes and shallow soils. The percentage of forest area is also a significant factor that affects the generation of runoff. Forested catchments generally have lower runoff coefficients and slower runoff response due to the high infiltration rates and high water storage capacities of forest soils. The presence of trees also reduces the erosive power of runoff, which leads to lower sediment yields and improved water quality. Mean catchment slope is another factor that contributes in the generation of runoff. Catchments with steeper slopes have higher runoff coefficients and more rapid runoff response due to the reduced infiltration capacity of the soils, and the rapid movement of water down the slope. In contrast, catchments with flatter slopes have lower runoff coefficients and slower runoff response due to the higher infiltration capacity of the soils and the slower movement of water across the landscape.

7. In line 250 – 254, the authors state “The simulation period is split-sampled into.....”but do not justify the use of Split Sample method in model calibration. Refer to Arsenault et. al., 2018. The hazards of split-sample validation in hydrological model calibration.

7. We thank the Reviewer #2 for the critical note on split-sampling. Indeed, split-sampling is only recommended if both, calibration and validation period represent similar climate and hence catchment conditions. However, we did not find any issues with the selected periods in terms of very wet or dry periods, so we decided for the ‘classical’ split-sampling approach. Also, there are references (e.g., Perrin et al., 2003) that support the choice. E.g., the developers of GR4H used the split-sample approach to evaluate the model's performance during the validation period and make adjustments to the model parameters. The authors argue that the split-sample approach is a useful tool for evaluating the performance of hydrological models and avoiding overfitting to the calibration data. They suggest that at least 20% of the data should be reserved for validation to ensure that the model is not overfit to the calibration data and provides a more accurate assessment of the model's performance.

Perrin, C., Michel, C., & Andreassian, V. (2003). Improvement of a parsimonious model for streamflow simulation. *Journal of Hydrology*, 279(1-4), 275-289.7.

8. Line 268 – 273 Please check the font and line spacing

8. We thank Reviewer #2 for pointing to this issue, the format will be adapted in the revised version. Thanks.
